# Supplementary material for: Alginate/Chitosan Particle-Based Drug Delivery Systems for Pulmonary Applications
Source: PubMed Central journal article supplement (PMC6722511; doi:10.3390/pharmaceutics11080379), 2019-08-02
Supplement: pharmaceutics-11-00379-s001.pdf [file pharmaceutics-11-00379-s001.pdf]

# Supplementary Materials: Alginate/Chitosan Particle-Based Drug Delivery Systems for Pulmonary Applications

Marcus Hill, Matthew Twigg, Emer A. Sheridan, John G. Hardy, J. Stuart Elborn, Clifford C. Taggart, Christopher J. Scott and Marie E. Migaud

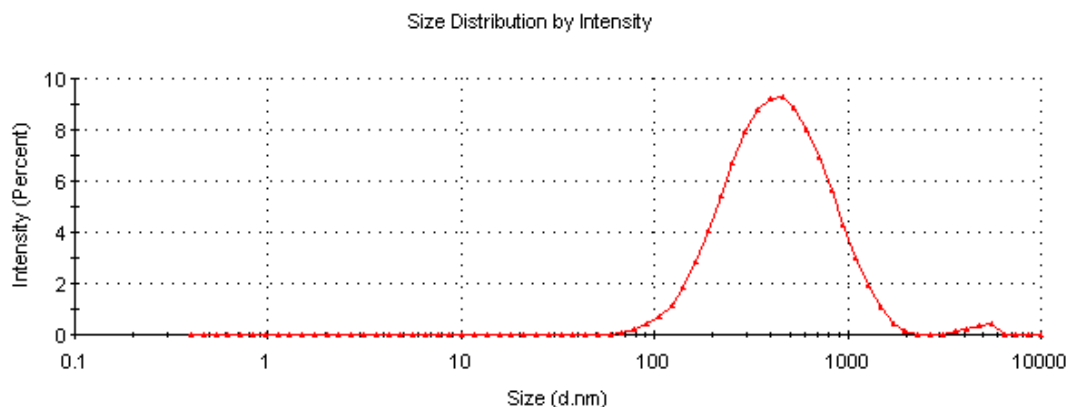

**Figure S1.** DLS analysis of the particles prepared with the optimal formulation of alginate:chitosan:tobramycin (9:1:1.5, *w/w/w*).

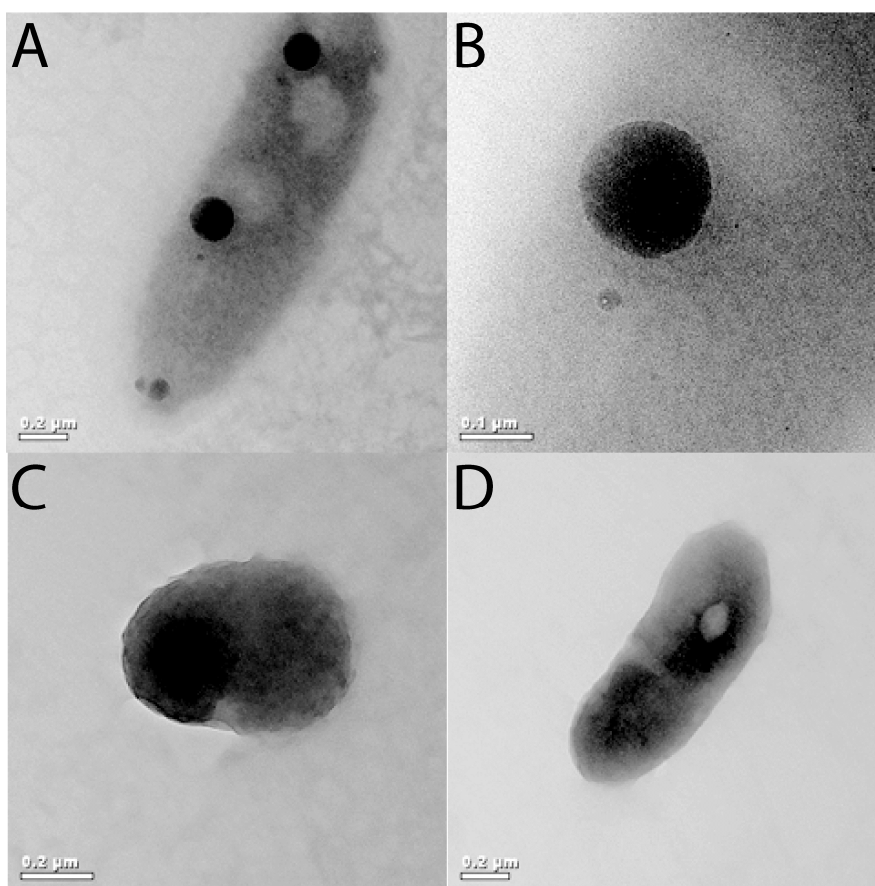

**Figure S2.** TEM analysis of alginate/chitosan particles. (A) Image showing particles observed at  $\times 9,900$  (scale bar 200 nm). (B) Increased resolution image at  $\times 29,000$  showing a single particle within the 100–200 nm size range (scale bar 100 nm). (C) and (D) enhanced magnification image at  $\times 15,000$  and  $\times 9,900$ , respectively, showing agglomeration of individual particles (scale bar 200 nm).

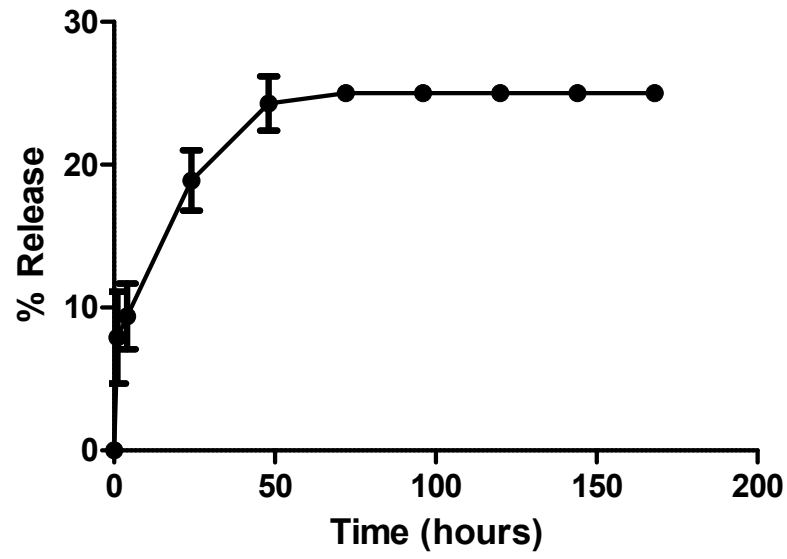

**Figure S3.** Cumulative release of tobramycin release from alginate/chitosan particles. Mean  $\pm$  S.D,  $N = 3$ .

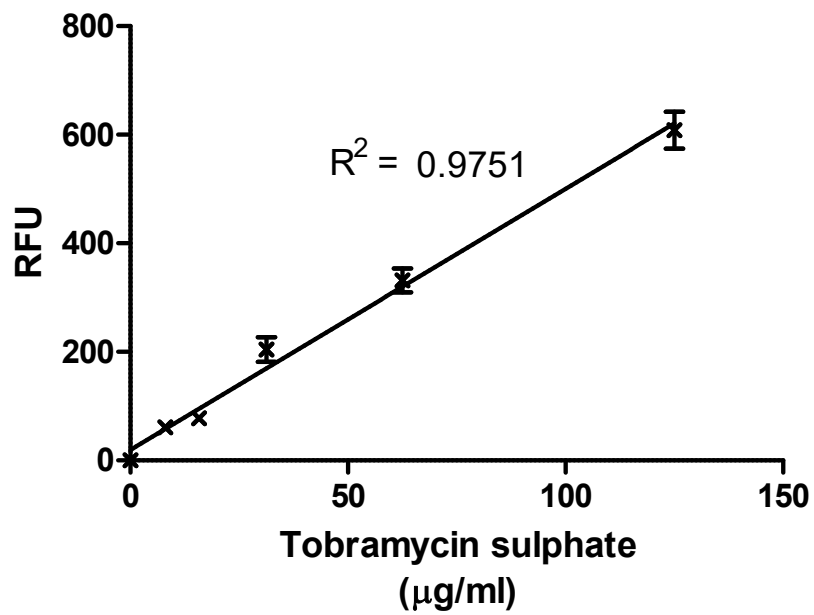

**Figure S4.** Calibration curve for tobramycin sulphate in particle supernatant following formulation of tobramycin loaded alginate/chitosan particles. Mean  $\pm$  S.D,  $N = 3$ .

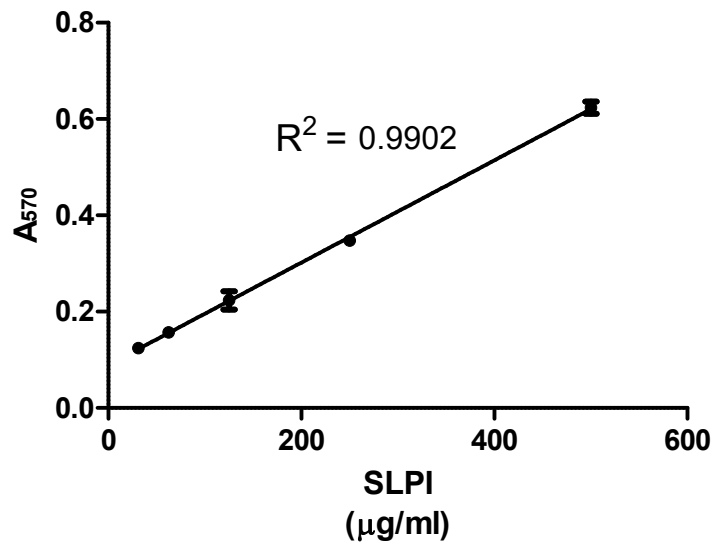

**Figure S5.** Calibration curve for SLPI in the range (31.25–500 µg/mL) quantified with the BCA assay kit (Pierce, UK). Mean ± S.D,  $N = 3$ .

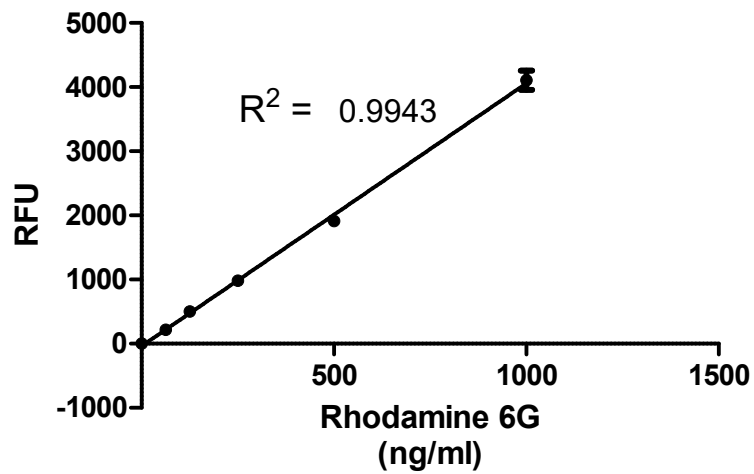

**Figure S6.** Standard curve of Rhodamine 6G in the concentration range (0–1000 ng/mL). Mean ± S.D,  $N = 3$ .
